# Supplementary material for: Coevolution of URAT1 and Uricase during Primate Evolution: Implications for Serum Urate Homeostasis and Gout
Source: PubMed Central journal article supplement (PMC4989112; doi:10.1093/molbev/msw116), 2016-06-26
Supplement: supp_msw116_TAN_MBE_Supplemental_Material.pdf [file supp_msw116_TAN_MBE_Supplemental_Material.pdf]

# **Coevolution of URAT1 and uricase during primate evolution: implications for serum urate homeostasis and gout**

## **Supplemental Figures and Tables**

### **Supplemental Fig. S1.** Expression of human and rat URAT1.

Western blot of hemagglutinin (HA) epitope-tagged human and rat URAT1. **(a)** The HA epitope was inserted at the same position both constructs. Plasma membrane enriched fractions from transfected cells were blotted and probed with antibodies to HA and actin. Quantitation of the signal showed that rat URAT1 wild type is expressed at 2.62-fold higher levels than human URAT1. **(b)** Kinetic transport data of human URAT1 (red) and rat URAT1 (green), normalized to the protein expression levels obtained from the quantitative Western blot in **(a)**. Human URAT1 is a high affinity/low capacity transporter relative to rat URAT1. Kinetic transport data **(b)** of human URAT1 (red) and rat URAT1 (green), normalized to the protein expression levels obtained from the quantitative Western blot in **(a)**. Human URAT1 is a high affinity/low capacity transporter relative to rat URAT1.

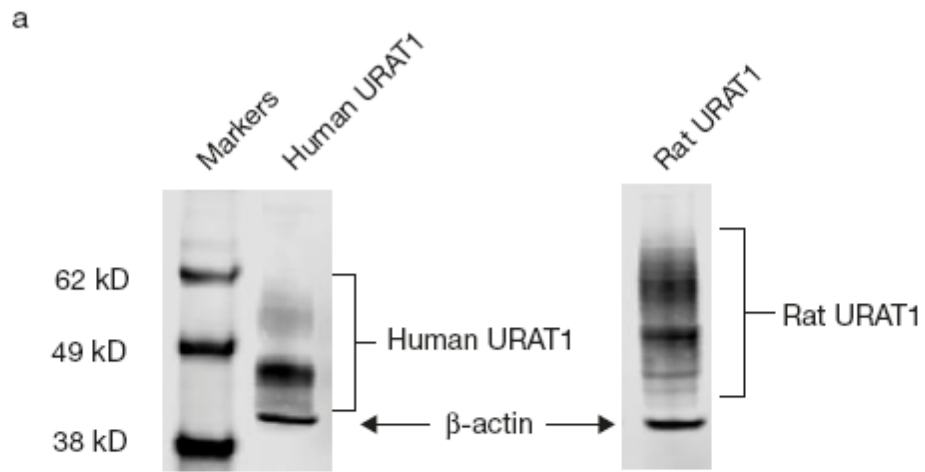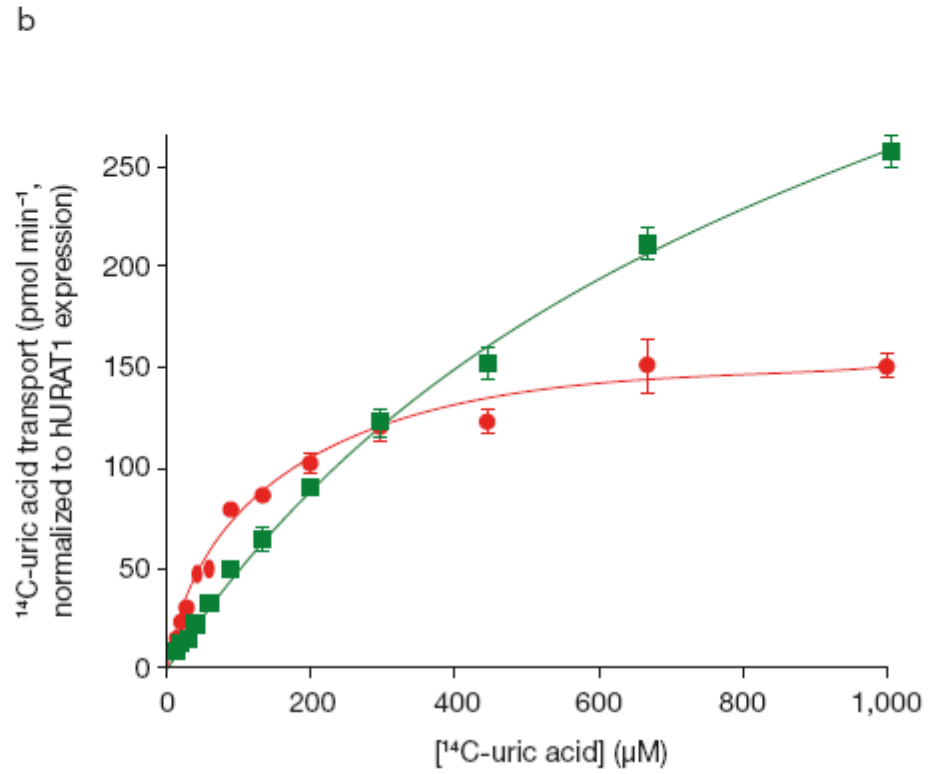

**Supplemental Fig. S2. Protein sequences of URAT1 transporters used in this study.**

Human URAT1

MAFSELDDLVGGLGRFQVLQTMALMVSIMWLCTQSMLNENFSAAVPSHRCWAPLLDNSTAQASILGSLSP  
ALLAISIPPGPNQRPHQCRRFRQPQWQLLDPNATATSWSEADTEPCVDGWVYDRSIFTSTIVAKWNLVCD  
SHALKPMAQSIYLAGILVGAACGPASDRFGRRVLVLTWSYLQMAVMGTAAAFAPAFPVYCLFRFLLAFAV  
AGVMMNTGTLLEWETAARARPLVMTLNSLGFSGHGLTAAVAYGVRDWTLLQLVSVFPFLCFLYSWWLA  
ESARWLLTTGRLDWGLQELWRVAAINGKGAVDTLTPEVLLSAMREELSMGQPPASLGTLRMPGLRFRT  
CISTLCWFAGFTFFGLALDLQALGSNIFLLQMFIVVDIPAKMGALLLSHLGRRPTLAASLLLAGLCI  
LANTLVPHEMGALRSALAVLGLGGVGAFTCITIYSELFPVLRMTAVGLGQMAARGGAILGPLVRLLG  
VHGFWLPLLVYGTVPVLSGLAALLLPETQSLPLPDTIQDVQNVAVKKATHGTLGNSVLKSTQF

Rat (*Rattus norvegicus*) URAT1

MAFPELLDRVGGGRFQQLQAVLVTPILWVTTQNMLENENFSAAVPHHRCWVPLLDNSTSQASIPGDFGRD  
VLLAVSIPPGPDQQRPHQCLFRFRQPQWQLIESNTTATNWSADTEPCEDGWVYDHSTFRSTIVTTWDLVCD  
SQALRPMAQSIIFLAGILVGAAVCGHASDRFGRRVLVLTWSYLLVSVSGTIAALMPTFFLYCLFRFLVASAV  
AGVMMNTASLLMEWTSQAQGPLMMLNLALGFSGQVLTGSVAYGVRSWRMLQLAVSAPFFLFFVYSWWLP  
ESARWLITVGRLDQSLRELQRVAAVNRKAEADTLTVEVLRMSAMQEEPNGNQAGARLGTLLHTPGLRLRT  
FISMLCWFAGFTFFYGLALDLQALGSNIFLLQALIGIVDLPVKMGSLLLLSRLGRRLCQASSLVLPGLCI  
LANILVPREMGILRSSLAVLGLGSLGAFTCVTIFSELFPVIRMTAVGLGQVAARGGAMLGPLVRLLG  
VYGSWLPLLVYGVVPLVLSGLAALLLPETKNLPLPDTIQDIQKQSVKKVTHDIAGGSVLKSARL

Mouse (*Mus musculus*) URAT1

MAFPELLDRVGGGLGRFQVLQTVLTPILWVTTQNMLENENFSAAVPHHRCWVPLLDNSTSQASIPGDLGPD  
VLLAVSIPPGPDQQRPHQCLFRFRQPQWQLTESNATATNWSADAATEPCEDGWVYDHSTFRSTIVTTWDLVCN  
SQALRPMAQSIIFLAGILVGAAVCGHASDRFGRRVLVLTWSYLLVSVSGTAAAFMPTFFLYCLFRFLLASAV  
AGVMMNTASLLMEWTSQAQGPLMMLNLALGFSGQVLTGSVAYGVRSWRMLQLAVSAPFFLFFVYSWWLP  
ESARWLITVGLDQGLQELQRVAAVNRKAEADTLTMEVLRMSAMEEPPSRDKAGASLGTLLHTPGLRHRT  
IISMLCWFAGFTFFYGLALDLQALGSNIFLLQALIGIVDFPVKTGSLLLSRLGRRLCQVSFLVLPGLCI  
LSNIVPHGMGVLRSALAVLGLGCLGGAFTCITIFSELFPVIRMTAVGLCQVAARGGAMLGPLVRLLG  
VYGSWMPLLVYGVVPLVLSGLAALLLPETKNLPLPDTIQDIQKQSVKKVTHDTPDGSILMSTRL

Baboon (*Papio anubis*) URAT1

MAFSELDDLVGGLGRFQVLQTVLMLMVSIMWLSTQSMLNENFSAAVPSHRCWVPLLDNSTAQAGVPGGLTPE  
ALLAVSIPPGPNQQRPHQCRRFRQPQWQILDPNATATSWSEADTEPCVDGWVYDRSIFTSTIVAKWNLVCD  
SHALKPMAQSIYLAGILVGAACGPASDRFGRRVLVLTWSYLQMAVMGTAAAFAPTFFPVYCLFRFLLAFAV  
AGVMMNTGTLLEWETAARARPLVMTLNSLGFSGHGLTAAVAYGVRDWTLLQLVSVFPFLCFLYSWWLA  
ESARWLLTTGRLDWGLRELWRVAAINGKGTVRDTLTPEVLLSAMREELSMQAPASLGTLRTPGLRFRT  
CISMLCWFAGFTFFGLALDLQALGSNIFLLQMFIVVDIPAKMGALLLSRLGRRPTQAASLLLAGLCI  
LANTLVPHELGAVERLRSALAVLGLGGVGAAYTCITIYSELFPVLRMTAVGLGQMAARAGAILGPLVRLLG  
VHGFWLPLLVYGTVPVLSGLAALLLPETQSLPLPDTIQDVQNVVKKTTHTGTLGNSVLKSTQF

An62

MAFSELLDQVGGLGRFQVLQTVLVPIMWLTTHNMLENENFSAAVPSHRCWVPLLDNSTAQASVPGALDPE  
ALLAVSIPPGPNQQRPHQCRRFRQPQWQLLDPNATATNWSAATEPCVDGWVYDHSTFTSTIVTKWDLVCD

SQALKPMAQSIYLAGILVGAAVCGHASDRFGRRLLVLTWSYLQMAVSGTAAAFAPTFPVYCLFRFLVAFVAV  
AGVMMNTGTLLEWTSARPLAMTLNSLGFSGQVLMMAVAYGVRDWALLQLAVSAPFFLCFVYSWWLA  
ESARWLLITGRLEGLQELQRVAAINGKRAVGDTLTIEVLLSAMQEELSVGQAPASLGTLRLRTPGLRLRT  
CVSTLCWFAGFTFYGLALDLQALGSNIFLLQVLIQVVDIPAKMGTTTTLLSRLGRRPTQAASLVLAGLCI  
LANTLVPHEMGALRSALAVLGLGGVGAFTCITIIYSGELFPTVLRMTAVGLGQMAARGGAILGPLVRLLG  
VHGPSLPLLVIYGTVPVLSGLAALLLPETQSLPLPDTIQDVQONQAVKKATHSTQGHSVLKSTRL

An63

MAFSELDDQVGGGLGRFQVLQTVLALVVPIMWLTTHNMLENFSAAVPSHRCWVPLLDNSTAQASVPGALDPE  
ALLAVSIPGPNQOPHQRRFRQPQWQLLDPNATATNWSEAAATEPCVDGWVYDHSFTSTIVTKWDLVCD  
SQALKPMAQSIYLAGILVGAAVCGHASDRFGRRLLVLTWSYLQMAVSGTAAAFAPTFPLYCLFRFLVAFVAV  
AGVMMNTGTLLEWTSARPLMMTLNSLGFSGQVLMMAVAYGVRDWALLQLAVSAPFFLCFVYSWWLP  
ESARWLLITGKLERGLQELQRVAAINGKRAAGDTLTMEVLLSAMQEELSGGQAPASLGTLRLRTPGLRLRT  
CVSMLCWFAGFTFYGLALDLQALGSNIFLLQVLIQVVDLPAKMGTTTTLLSRLGRRPSQAASLVLPGLCI  
LANTLVPHEMGALRSALAVLGLGSVGAFTCITIIYSGELFPTVLRMTAVGLGQMAARGGAILGPLVRLLG  
VHGPSLPLLVIYGTVPVLSGLAALLLPETQNLPLPDTIQDVQONQAVKKATHSTPGHSHVLKSTRL

An74

MAFSELDDQVGGGLGRFQVLQTVLALVVPIMWLTTHNMLENFSAAVPSHRCWVPLLDNSTAQASVPGALDPE  
ALLAVSIPGPNQOPHQRRFRQPQWQLLDPNATATNWSEAAATEPCVDGWVYDHSFTSTIVTKWDLVCD  
SQALKPMAQSIYLAGILVGAAVCGPASDRFGRRLLVLTWSYLQMAVSGTAAAFAPTFPVYCLFRFLVAFVAV  
AGVMMNTGTLLEWTSARPLVMTLNSLGFSGQVLMMAVAYGVRDWALLQLAVSAPFFLCFVYSWWLA  
ESARWLLITGRLEGLQELQRVAAINGKRAVGDTLTIEVLLSAMQEELSVGQAPASLGTLRLRTPGLRLRT  
CVSTLCWFAGFTFYGLALDLQALGSNIFLLQVLIQVVDIPAKMGTTTTLLSRLGRRPTQAASLVLAGLCI  
LANTLVPHEMGALRSALAVLGLGGVGAFTCITIIYSGELFPTVLRMTAVGLGQMAARGGAILGPLVRLLG  
VHGPSLPLLVIYGTVPVLSGLAALLLPETQSLPLPDTIQDVQONQAVKKATHSTQGHSHVLKSTRL

An75

MAFSELDDLVGGLGRFQVLQTVLALMVSIMWLCTQNMLENFSAAVPSHRCWVPLLDNSTAQAGVPGGLSPE  
ALLAVSIPGPNQRPHQRRFRQPQWQLLDPNATATSWSEADTEPCVDGWVYDRSTFTSTIVTKWDLVCD  
SHALKPMAQSIYLAGILVGAACGPASDRFGRRLLVLTWSYLQMAVMGTAAAFAPTFPVYCLFRFLVAFVAV  
AGVMMNTGTLLEWTTAAQARPLVMTLNSLGFSGHGLTAAVAYGVRDWALLQLAVSVPFFLCFLYSWWLA  
ESARWLLITGRLEDRGLQELWRVAAINGKGAQDTLTPEVLLSAMQEELSMGQAPASLGTLRLRTPGLRLRT  
CISTLCWFAGFTFFGLALDLQALGSNIFLLQMLIQVVDIPAKMGTTTTLLSRLGRRPTQAASLLLAGLCI  
LANTLVPHEMGALRSALAVLGLGGVGAFTCITIIYSGELFPTVLRMTAVGLGQMAARGGAILGPLVRLLG  
VHGFWLPLLVIYGTVPVLSGLAALLLPETQSLPLPDTIQDVQONQAVKKATHGTLGNSVLKSTRF

An76

MAFSELDDLVGGLGRFQVLQTVLALMVSIMWLCTQSMLNFSAAVPSHRCWVPLLDNSTAQAGVPGGLSPE  
ALLAVSIPGPNQRPHQRRFRQPQWQLLDPNATATSWSEADTEPCVDGWVYDRSIFTSTIVAKWNLVCD  
SHALKPMAQSIYLAGILVGAACGPASDRFGRRLLVLTWSYLQMAVMGTAAAFAPTFPVYCLFRFLVAFVAV  
AGVMMNTGTLLEWTTAAQARPLVMTLNSLGFSGHGLTAAVAYGVRDWALLQLVVSVPFFLCFLYSWWLA  
ESARWLLITGRLEDRGLQELWRVAAINGKGAQDTLTPEVLLSAMREELSMGQAPASLGTLRLRTPGLRFRT  
CISTLCWFAGFTFFGLALDLQALGSNIFLLQMFIQVVDIPAKMGALLLLSRLGRRPTQAASLLLAGLCI  
LANTLVPHEMGALRSALAVLGLGGVGAFTCITIIYSSELFPTVLRMTAVGLGQMAARGGAILGPLVRLLG  
VHGFWLPLLVIYGTVPVLSGLAALLLPETQSLPLPDTIQDVQONQAVKKATHGTLGNSVLKSTQF

An79

MAFSELDDLVGGLGRFQVLQTVAlMVSIMWLCTQSMLNFSAAVPSHRCWAPLLDNSTAQAGVLGGLSPE  
ALLAISIPPGPNQRPHQCRRFRQPQWQLLDPNATATSWSEADTEPCVDGWVYDRSIFTSTIVAKWNLVCD  
SHALKPMAQSIYLAGILVGAAACGPASDRFGRRLLVLTWSYLQMAVMGTAAAFAPAFPVYCLFRFLLAFAV  
AGVMMNTGTLLEWETAARARPLVMTLNSLGFSGHGLTAAVAYGVRDWTLLQLVVSVPFFLCFLYSWWLA  
ESARWLLTTGRLLDRGLQELWRVAAINGKGAVDTLTPEVLLSAMREELSMGQAPASLGTLRRMPGLRFRT  
CISTLCWFAGFTFFGLALDLQALGSNIFLLQMFIVVDIPAKMGALLLSRLGRRPTLAASLLLAGLCI  
LANTLVPHEMGALRSALAVLGLGGVGAFTCITIYSELFPVLRMTAVGLGQMAARGGAILGPLVRLLG  
VHGPWLPLLVYGTVPVLSGLAALLPETQSLPLPDTIQDVQNQAVKKATHGTLGNSVLKSTQF

**Supplemental Fig. S3.** Phylogram of URAT1s based on amino acid analysis. Internal nodes are labeled with the posterior probability for each ancestral URAT1 sequence inferred. The scale bar represents 0.04 amino acid replacements per unit evolutionary time (except for the branches leading to *Myotis* and *Monodelphia* which have been shortened for display purposes). GenBank Identifier (GI) numbers are provided after each species name.

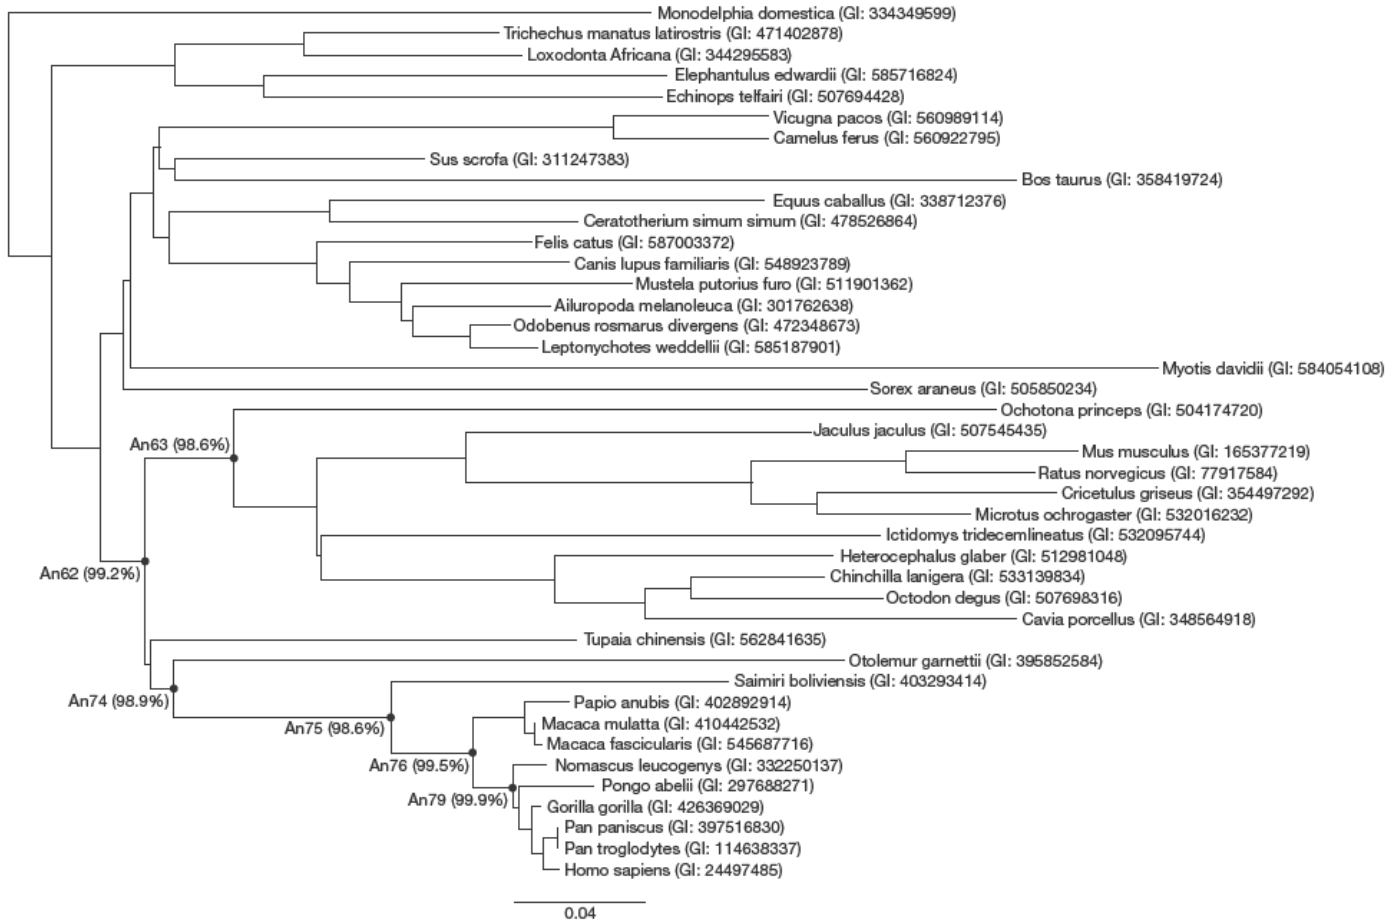

**Supplemental Table S1.** Mutagenic primers used in this study.

| Name    | Sequence                                                             | Purpose                                                                       |
|---------|----------------------------------------------------------------------|-------------------------------------------------------------------------------|
| h-F365Y | CCTTTGGCTTCACCTTCTAC<br>GGGCT <b>AG</b> CCCTGGACCTGC<br>AGGCC        | Production of hURAT1-F365Y; marked with <i>NheI</i> site                      |
| h-M25V  | GTTCCAGGTTCTCCAGACCA<br>TGGCTCTG <b>G</b> TGGTCTCCATC<br>ATGTGG      | Production of hURAT1-M25V, marked with site <i>NcoI</i> and <i>XcmI</i> sites |
| h-S27P  | CGATGGCTCTGATGGT <b>ACCC</b><br>ATCATGTGGCTGTG                       | Production of hURAT1-S27P, marked with <i>KpnI</i> site                       |
| h-L414V | CAGAGCCCCGCCAGCACCA<br><b>AGCTT</b> GCGGCCAGCGTGGG                   | Production of hURAT1-L414V, marked with <i>HindIII</i> site                   |
| r-Y365F | CCTTTGGCTTCACCTTCTTT<br>GGGCT <b>AG</b> CCCTTGACCTGC<br>AAGC         | Production of rURAT1-Y365F; marked with <i>NheI</i> site                      |
| h-HA    | AAGGCAACACATGGCTATCC<br>CTACGACGTCCCTGATTATG<br>CTACGCTGGGGAACTCTGTC | Production of hURAT1-HA (insertion of HA sequence after amino acid 541)       |
| r-HA    | GAAAGTGACACATGACTATC<br>CCTACGACGTCCCTGATTAT<br>GCTATAGCAGGCGGCTCCG  | Production of rURAT1-HA (insertion of HA sequence after amino acid 541).      |

Residues in bold are modified from wild type sequences. Primers for insertion of the HA epitope tag all carry the sequence TATCCCTACGACGTCCCTGATTATGCT, encoding the peptide sequence YPYDVPDYA.
